# Supplementary material
Source: PubMed Central journal article supplement (PMC4455677)
Supplement: 132871suppa1.pdf [file 132871suppa1.pdf]

**Table E1: Details of the Acquisition Parameters for Simulation CT and Diagnostic CT**

| Patient No. | Display Field of View (mm) |               | Tube Current (mA) |               | Peak Voltage (kVp) |               | Section Thickness (mm) |               | Pixel Size (mm) |               |
|-------------|----------------------------|---------------|-------------------|---------------|--------------------|---------------|------------------------|---------------|-----------------|---------------|
|             | Simulation CT              | Diagnostic CT | Simulation CT     | Diagnostic CT | Simulation CT      | Diagnostic CT | Simulation CT          | Diagnostic CT | Simulation CT   | Diagnostic CT |
| 1           | 500                        | 250           | 283               | 160           | 120                | 120           | 3                      | 1.25          | 0.98            | 0.49          |
| 2           | 500                        | 250           | 100               | 220           | 120                | 120           | 3.75                   | 1.25          | 0.98            | 0.49          |
| 3           | 500                        | 250           | 208               | 200           | 120                | 120           | 2.5                    | 1.25          | 0.98            | 0.49          |
| 4           | 500                        | 250           | 283               | 160           | 120                | 120           | 3                      | 1.25          | 0.98            | 0.49          |
| 5           | 500                        | 250           | 297               | 160           | 120                | 120           | 2.5                    | 1.25          | 0.98            | 0.49          |
| 6           | 500                        | 250           | 208               | 160           | 120                | 120           | 2.5                    | 1.25          | 0.98            | 0.49          |
| 7           | 500                        | 300           | 283               | 407           | 120                | 120           | 3                      | 1.25          | 0.98            | 0.59          |
| 8           | 500                        | 250           | 200               | 160           | 100                | 120           | 3.75                   | 1.25          | 0.98            | 0.49          |
| 9           | 500                        | 250           | 283               | 160           | 120                | 120           | 2                      | 1.25          | 0.98            | 0.49          |
| 10          | 500                        | 250           | 283               | 220           | 120                | 120           | 3                      | 1.25          | 0.98            | 0.49          |
| 11          | 500                        | 250           | 283               | 160           | 120                | 120           | 3                      | 1.25          | 0.98            | 0.49          |
| 12          | 500                        | 250           | 283               | 160           | 120                | 120           | 1                      | 1.25          | 0.98            | 0.49          |
| 13          | 500                        | 280           | 208               | 436           | 120                | 120           | 2.5                    | 3.75          | 0.98            | 0.55          |
| 14          | 500                        | 250           | 297               | 160           | 120                | 120           | 2.5                    | 1.25          | 0.98            | 0.49          |
| 15          | 500                        | 250           | 283               | 160           | 120                | 120           | 3                      | 1.25          | 0.98            | 0.49          |
| 16          | 500                        | 250           | 297               | 160           | 120                | 120           | 2.5                    | 1.25          | 0.98            | 0.49          |
| 17          | 500                        | 250           | 208               | 220           | 120                | 120           | 2.5                    | 1.25          | 0.98            | 0.49          |
| 18          | 500                        | 250           | 208               | 160           | 120                | 120           | 2.5                    | 1.25          | 0.98            | 0.49          |
| 19          | 500                        | 236           | 280               | 200           | 120                | 120           | 3                      | 2.5           | 0.98            | 0.46          |
| 20          | 500                        | 250           | 283               | 160           | 120                | 120           | 3                      | 1.25          | 0.98            | 0.49          |

**Table E2. Details of the Anatomic ROIs Contoured**

| Bone Landmarks                 | Cartilage         | Gland                              | Muscles                                   | Soft Tissues | Vessels                                |
|--------------------------------|-------------------|------------------------------------|-------------------------------------------|--------------|----------------------------------------|
| C1 vertebra                    | Thyroid cartilage | Pituitary gland                    | Superior pharyngeal constrictor           | Hypothalamus | Right and left internal carotid artery |
| C2 vertebra                    | Cricoid cartilage | Right and left parotid gland       | Middle pharyngeal constrictor             | Brainstem    | Right and left internal jugular vein   |
| C3 vertebra                    | Larynx            | Right and left submandibular gland | Inferior pharyngeal constrictor           | Soft palate  |                                        |
| C4 vertebra                    |                   |                                    | Genioglossus                              | Upper lip    |                                        |
| C5 vertebra                    |                   | Right and left thyroid lobe        | Mylohyoid                                 | Lower lip    |                                        |
| C6 vertebra                    |                   |                                    | Tongue                                    | Esophagus    |                                        |
| C7 vertebra                    |                   |                                    | Right and left anterior digastric muscles |              |                                        |
| T1 vertebra                    |                   |                                    | Right and left anterior scalene muscles   |              |                                        |
| Right and left jugular foramen |                   |                                    | Right and left buccinator                 |              |                                        |
| Right and left mastoid process |                   |                                    | Right and left medial pterygoid           |              |                                        |
| Hard palate                    |                   |                                    | Right and left lateral pterygoid          |              |                                        |
| Mandible                       |                   |                                    | Right and left levator scapulae           |              |                                        |
| Hyoid bone                     |                   |                                    | Right and left masseter                   |              |                                        |
| Right and left clavicle        |                   |                                    | Right and left platysma                   |              |                                        |
| Manubrium                      |                   |                                    | Right and left post digastric muscles     |              |                                        |
|                                |                   |                                    | Right and left posterior scalene muscles  |              |                                        |
|                                |                   |                                    | Right and left sternocleidomastoid        |              |                                        |
|                                |                   |                                    | Right and left trapezius                  |              |                                        |
